# Supplementary material for: Community barcoding reveals little effect of ocean acidification on the composition of coastal plankton communities: Evidence from a long-term mesocosm study in the Gullmar Fjord, Skagerrak
Source: PLOS journal article supplement (doi:10.1371/journal.pone.0175808), 2017-04-26
Supplement: S3 (10.1371/journal.pone.0175808.s003) [file journal.pone.0175808.s003.pdf]

| <b>Pipeline step</b>                                                              | <b>Program</b>         | <b>File</b>        | <b>Reads</b>           | <b>OTUs</b> |
|-----------------------------------------------------------------------------------|------------------------|--------------------|------------------------|-------------|
| Raw sequence data                                                                 |                        | forward<br>reverse | 4,987,876<br>4,987,876 |             |
| 1. Illumina adapter trimming and filtering                                        | Trimmomatic            | forward<br>reverse | 1,630,884<br>1,630,884 |             |
| 2. Quality filtering                                                              | FastQFS                | forward<br>reverse | 1,630,807<br>1,630,807 |             |
| 3. De-multiplexing<br>4. Barcode and primer trimming<br>5. Reorient reads 5' – 3' |                        | 18S<br><i>cox1</i> | 653,789<br>3,417       |             |
| 6. Similarity clustering                                                          | USEARCH v7             | 18S<br><i>cox1</i> |                        | 7,734<br>96 |
| 7. Re-assemble                                                                    | Geneious® 7.0.4        | 18S<br><i>cox1</i> |                        | 1,037<br>39 |
| 8. Alignment                                                                      | Geneious® 7.0.4        | 18S<br><i>cox1</i> |                        | 851<br>36   |
| 9. Mapping                                                                        | USEARCH v7             | 18S<br><i>cox1</i> |                        | 826<br>35   |
| 10. OTU abundance table                                                           | Microsoft Excel (2016) | 18S<br><i>cox1</i> | 536,609<br>2,638       | 740<br>31   |
